# Supplementary material for: Probing potential binding modes of the p53 tetramer to DNA based on the symmetries encoded in p53 response elements
Source: PubMed Central journal article supplement — Nucleic Acids Res. 2007 Nov 5;35(22):7733–47. doi: 10.1093/nar/gkm890 (PMC2190717; doi:10.1093/nar/gkm890), 2007-11-05
Supplement: nar_gkm890_1.pdf [file nar_gkm890_1.pdf]

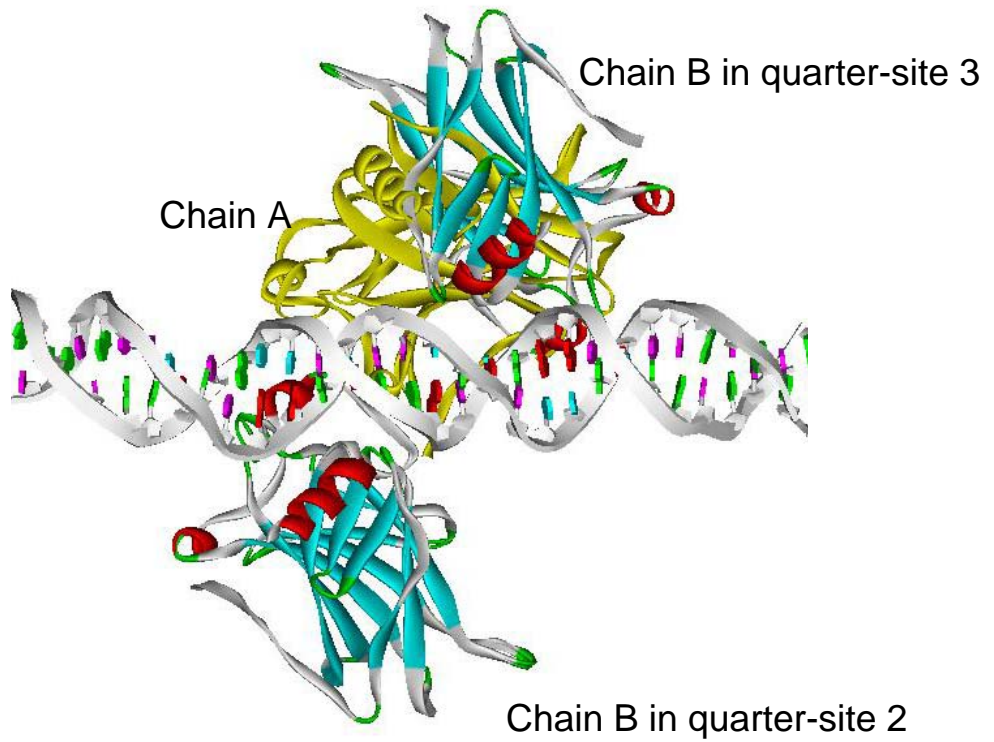

S-Figure 1

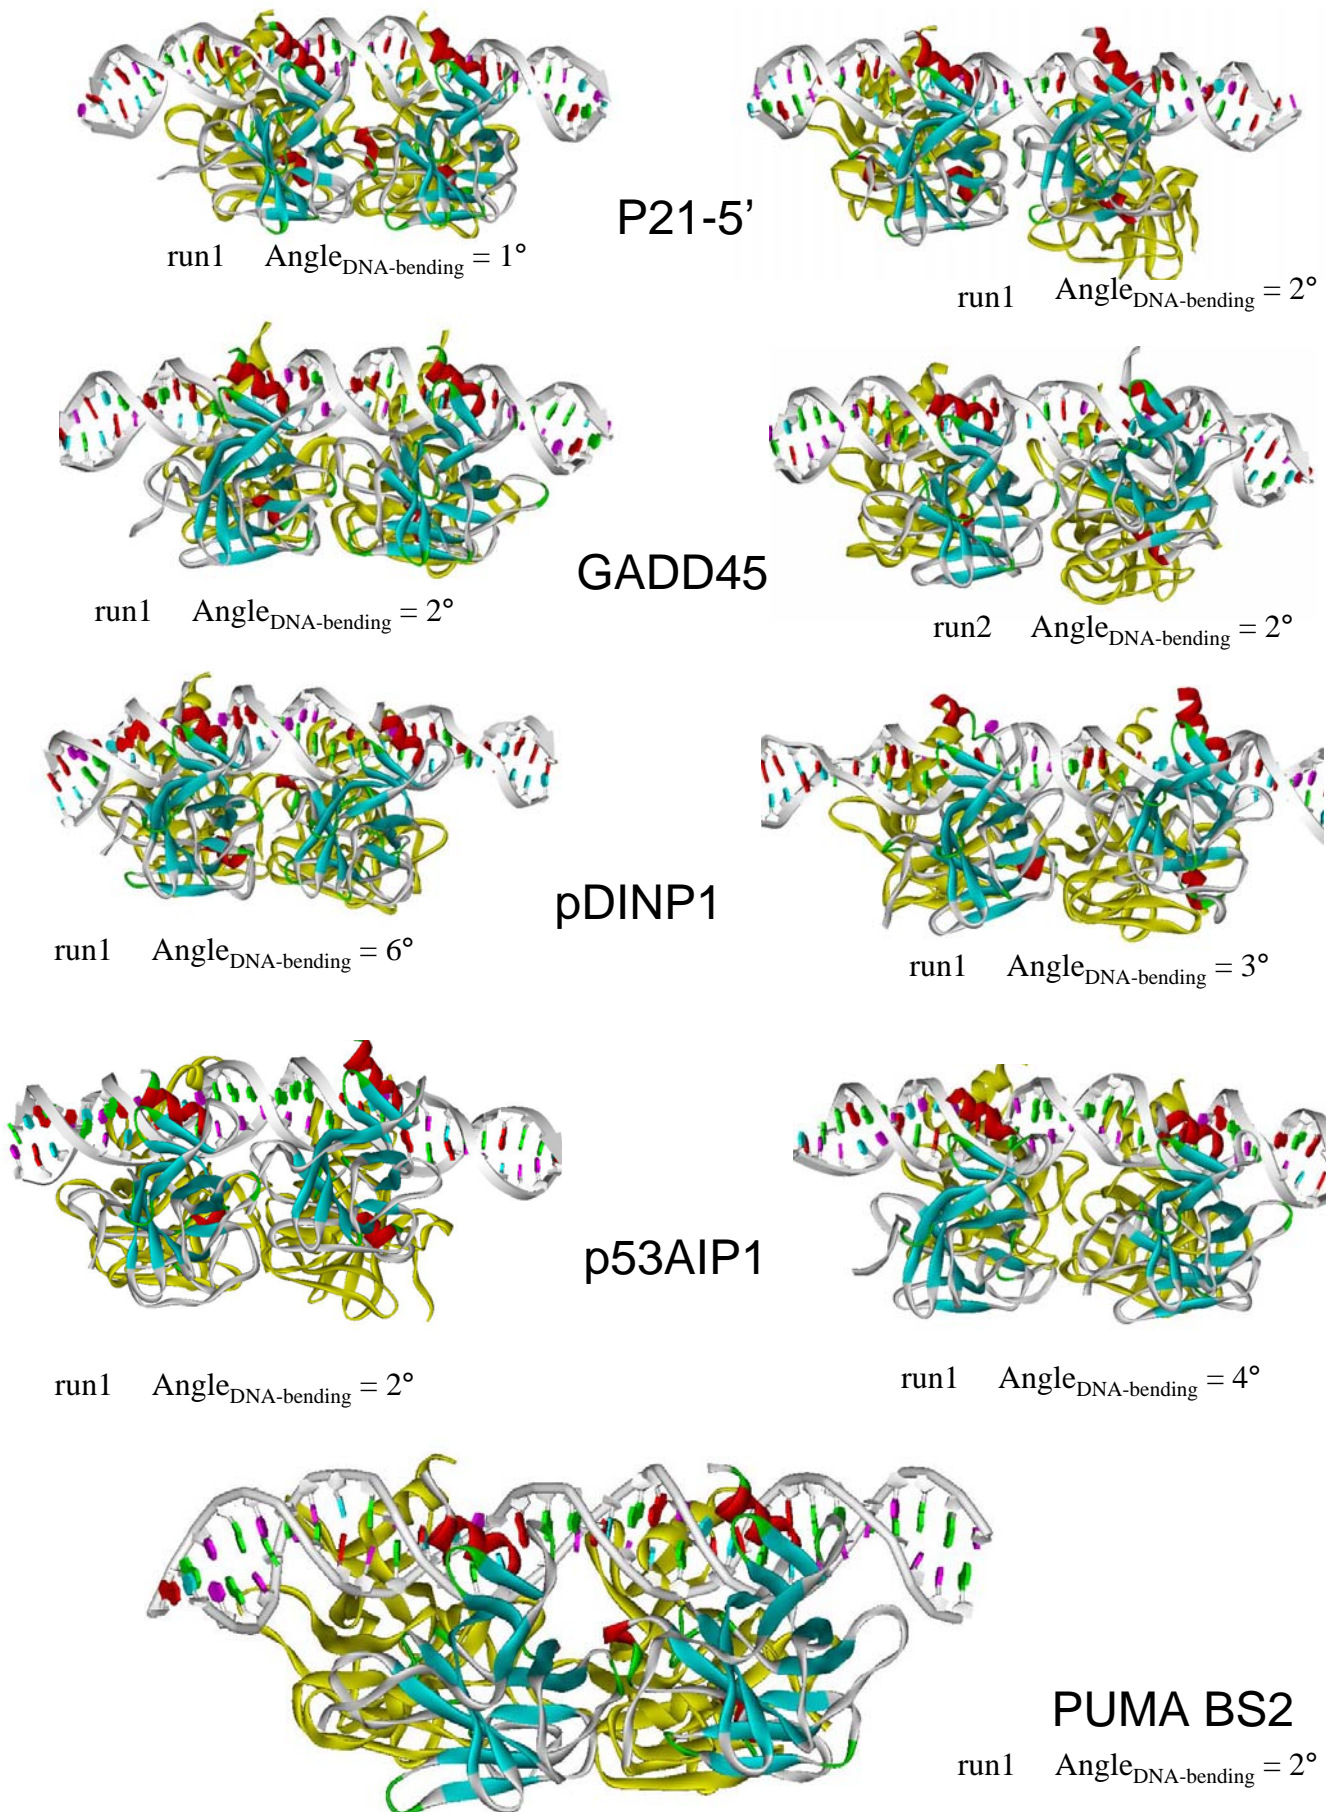

S-Figure 2

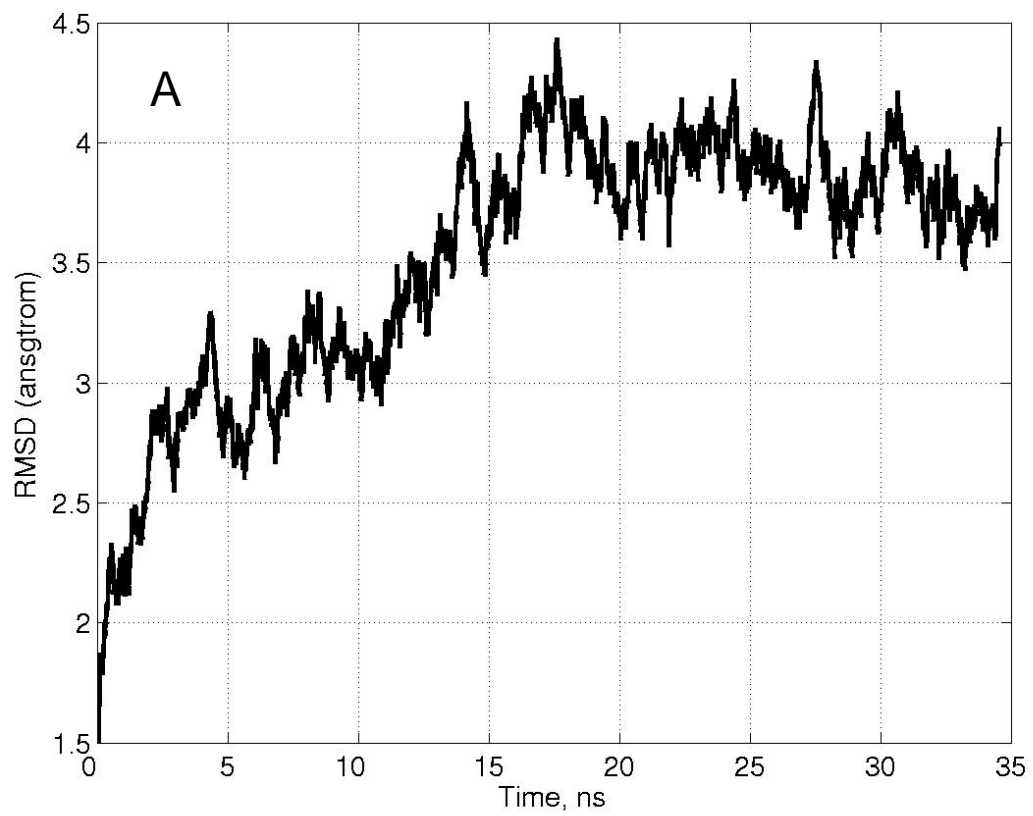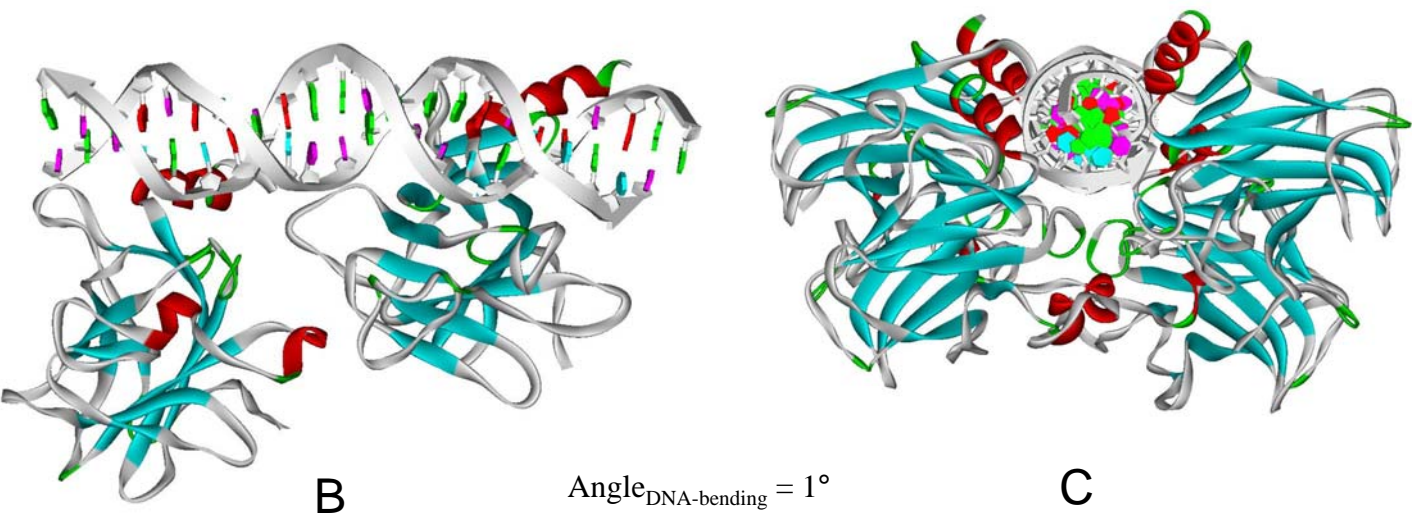

S- Figure 3



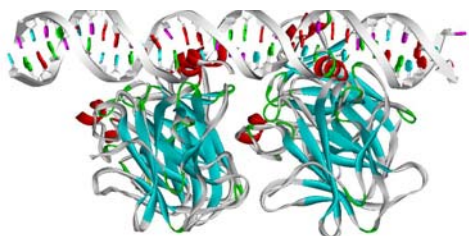

T13  $\text{Angle}_{\text{DNA-bending}} = 2^\circ$

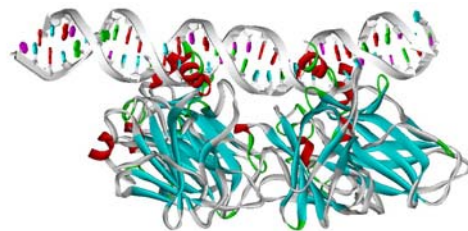

T24  $\text{Angle}_{\text{DNA-bending}} = 10^\circ$

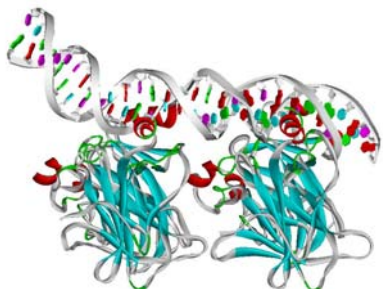

T13  $\text{Angle}_{\text{DNA-bending}} = 16^\circ$

GADD45

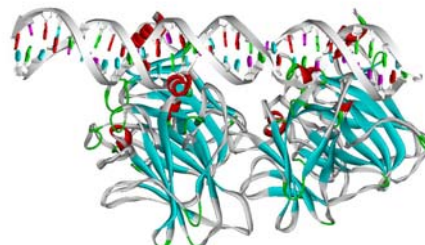

T24  $\text{Angle}_{\text{DNA-bending}} = 3^\circ$

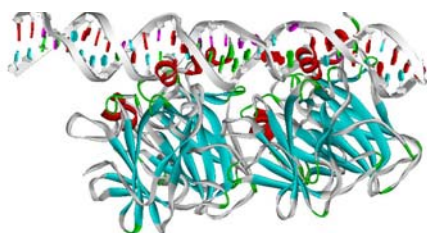

T13  $\text{Angle}_{\text{DNA-bending}} = 1^\circ$

pDINP1

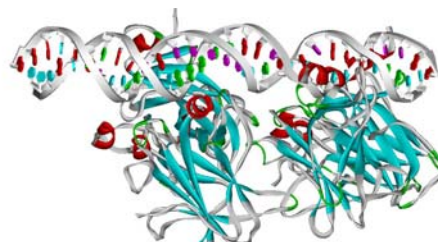

T24  $\text{Angle}_{\text{DNA-bending}} = 2^\circ$

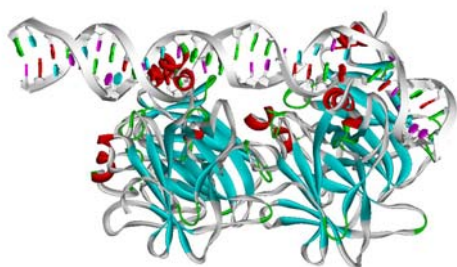

T13  $\text{Angle}_{\text{DNA-bending}} = 3^\circ$

p53AIP1

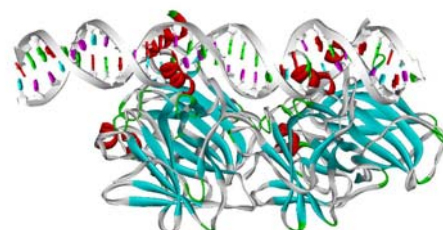

T24  $\text{Angle}_{\text{DNA-bending}} = 2^\circ$

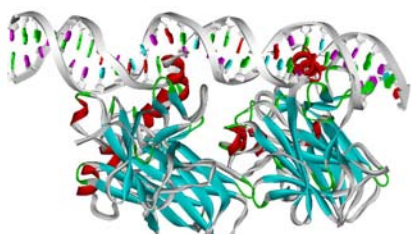

T13  $\text{Angle}_{\text{DNA-bending}} = 5^\circ$

Puma-BS2

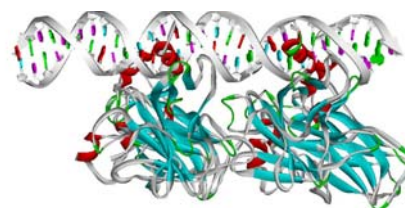

T24  $\text{Angle}_{\text{DNA-bending}} = 6^\circ$

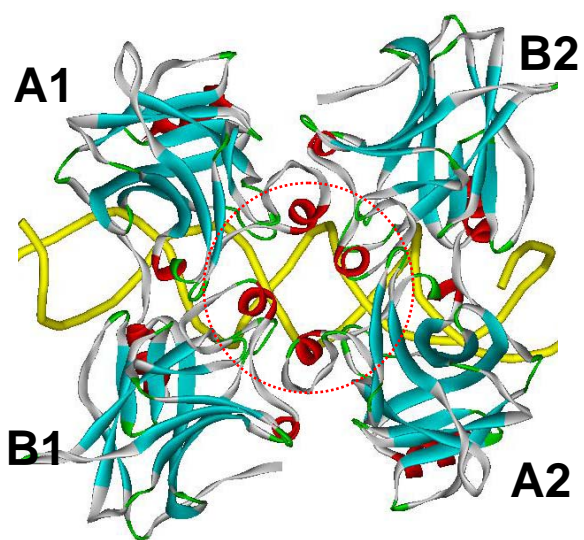

**I**

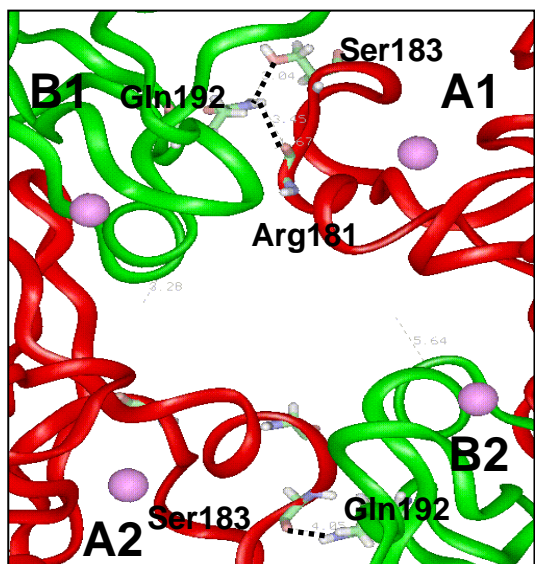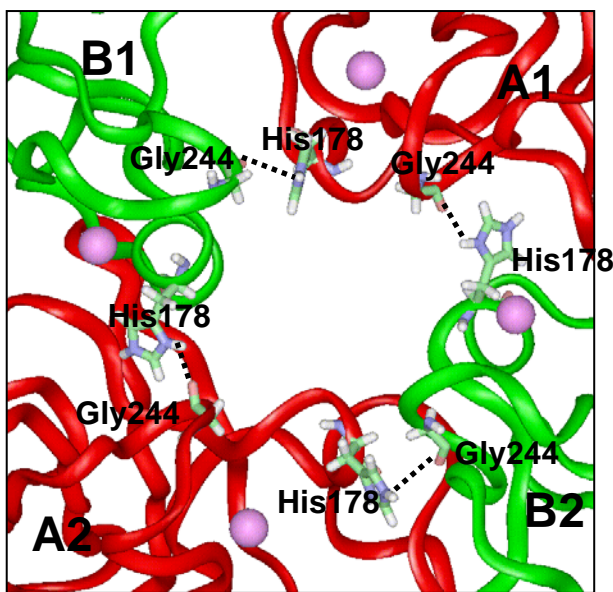

**III**

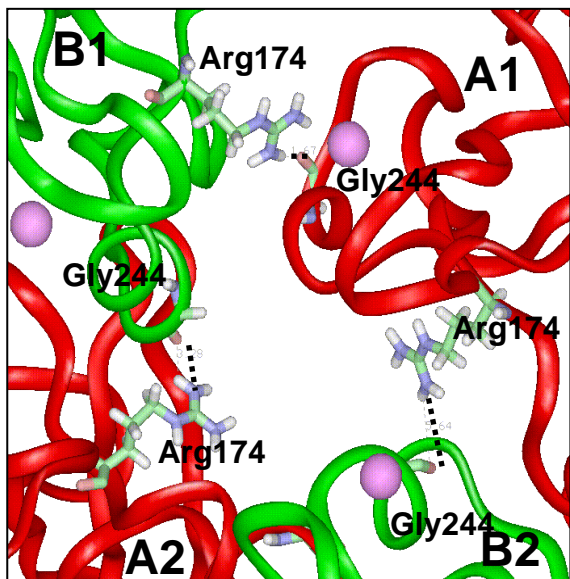

**IV**

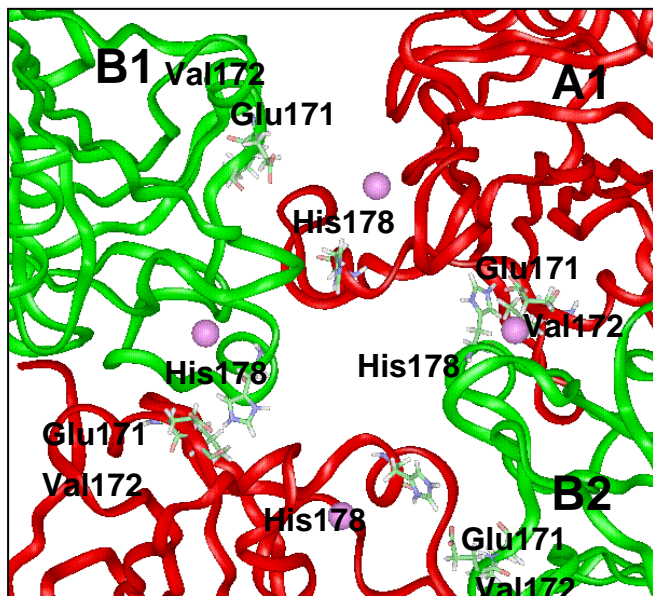

**V**

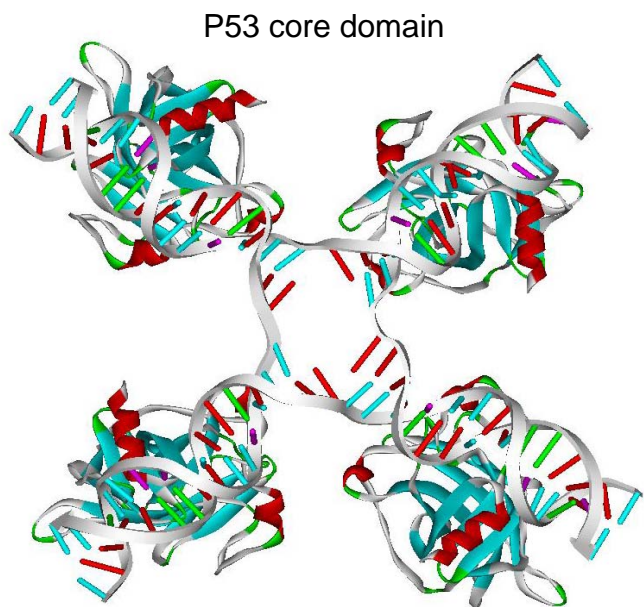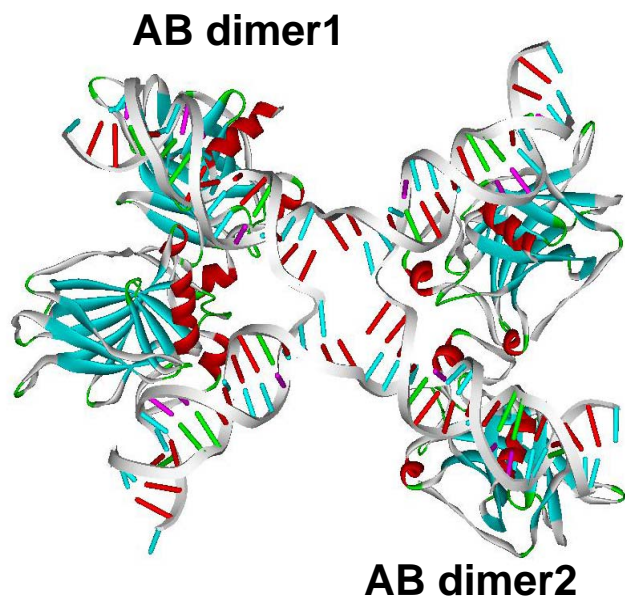

S-Figure 6



A

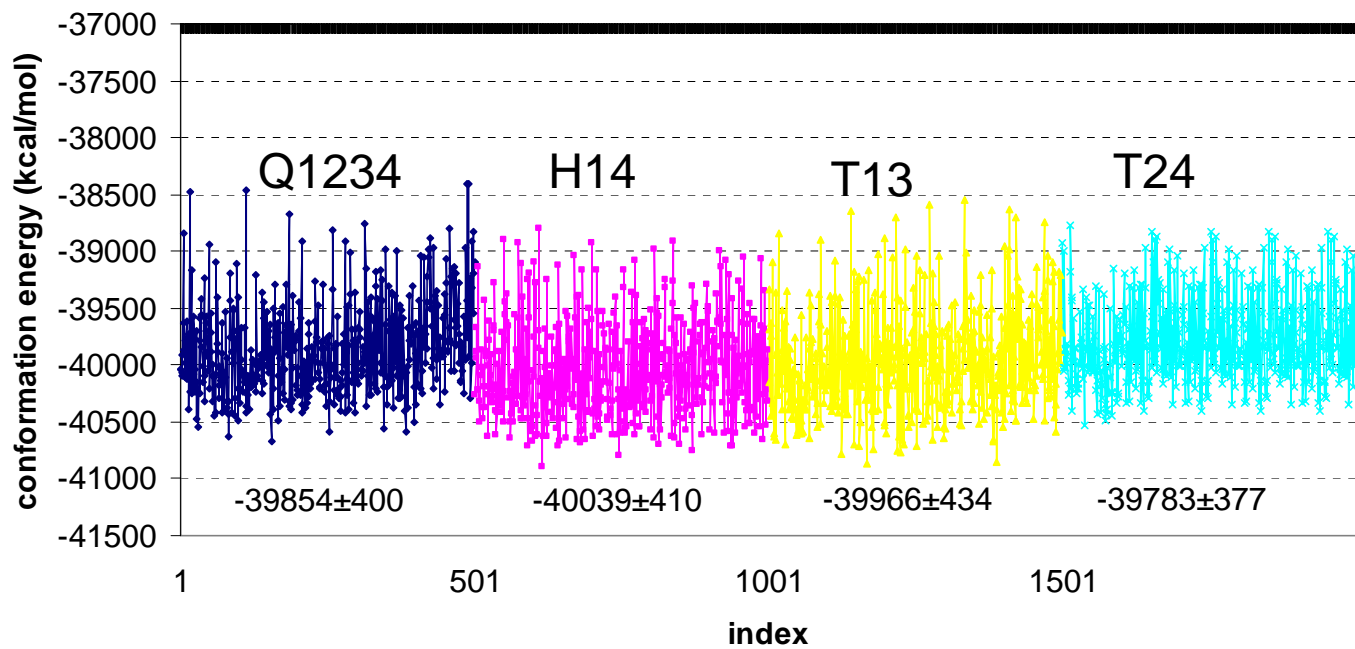

S-Figure 7

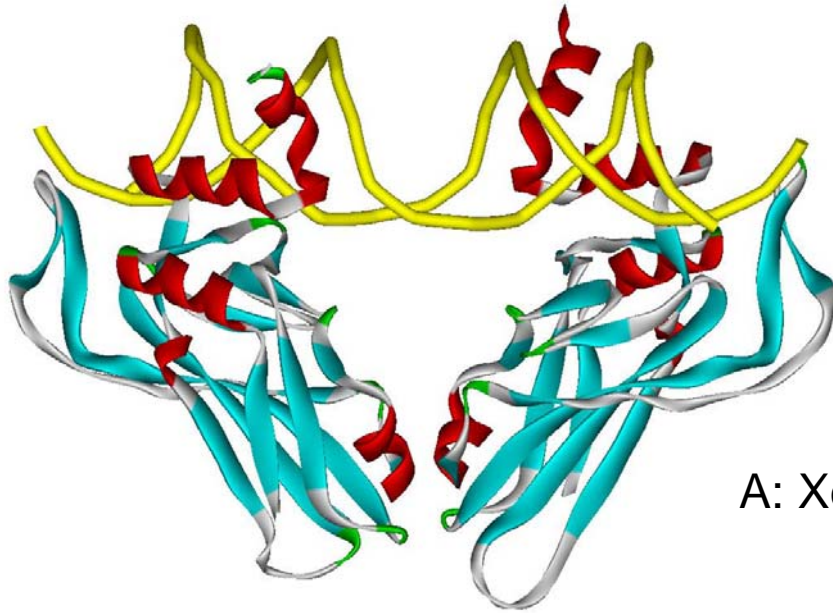

A: Xenopus Xbra

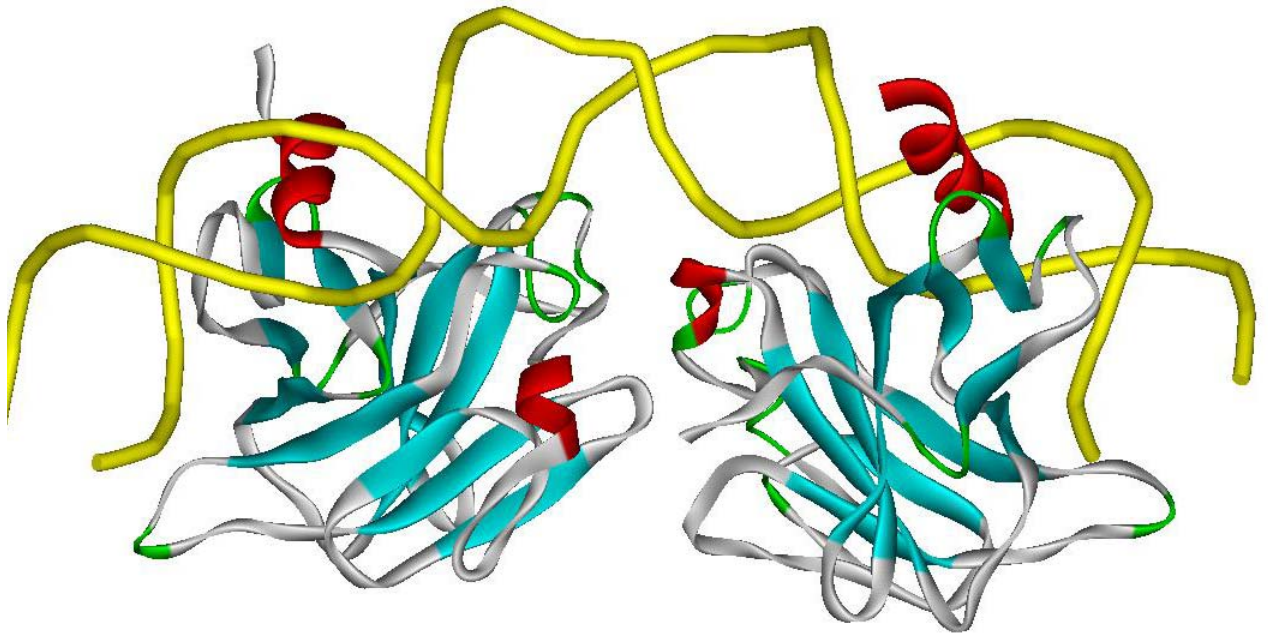

B. p53 in H14 binding mode
